# Supplementary material for: Newly Designed Primers for the Sequencing of the inlA Gene of Lineage I and II Listeria monocytogenes Isolates
Source: MDPI journal article supplement (doi:10.3390/ijms232214106), 2022-11-15
Supplement: s1 [file s1]

## Electronic Supplementary Materials

### Newly Designed Primers for the Sequencing of *inlA* gene of lineage I and II *Listeria monocytogenes* isolates

Giulia Magagna, Guido Finazzi and Virginia Filipello

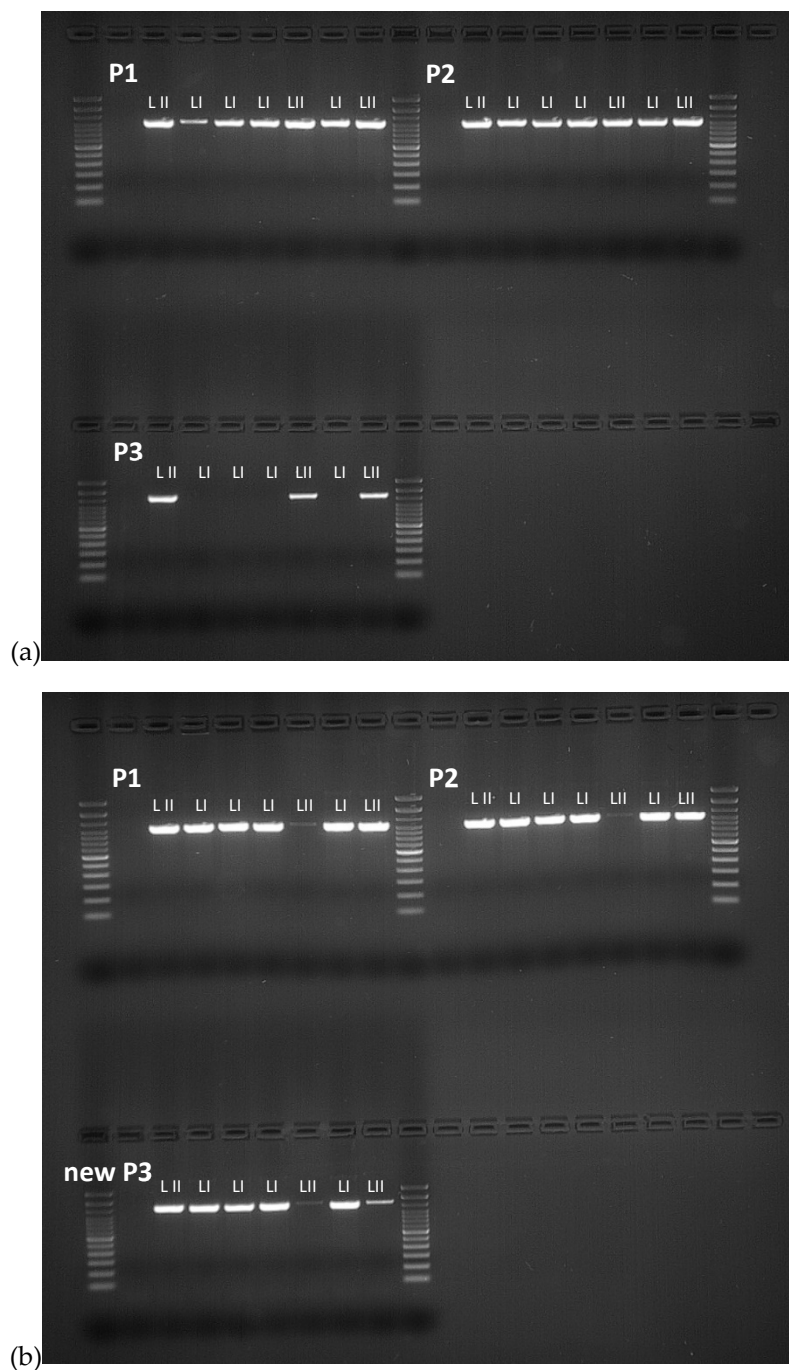

**Figure S1.** Gel electrophoresis image of *inlA* amplification of 7 additional *L. monocytogenes* isolates belonging to lineage I and II employing (a) the three primers set designed by Gelbíčová *et al.* [19], and (b) for the third fragment, the newly designed primers.

| Forward primer                   |  | C | T | A | T | A | C | C | T | T | T | A | G | C | C | A | A | C | C | T | G |
|----------------------------------|--|---|---|---|---|---|---|---|---|---|---|---|---|---|---|---|---|---|---|---|---|
| 1. CP044429.1                    |  | - | - | - | - | - | - | - | - | - | - | - | - | - | - | - | - | - | - | - | - |
| 2. CP007194.1: serotype 1/2c     |  | - | - | - | - | - | - | - | - | - | - | - | - | - | - | - | - | - | - | - | - |
| 3. NZ CP007194.1: serotype 1/2c  |  | - | - | - | - | - | - | - | - | - | - | - | - | - | - | - | - | - | - | - | - |
| 4. NZ CP007195.1: serotype 1/2c  |  | - | - | - | - | - | - | - | - | - | - | - | - | - | - | - | - | - | - | - | - |
| 5. CP007195.1: serotype 1/2c     |  | - | - | - | - | - | - | - | - | - | - | - | - | - | - | - | - | - | - | - | - |
| 6. NZ CP006859.1: serotype 1/2a  |  | - | - | - | - | - | - | - | - | - | - | - | - | - | - | - | - | - | - | - | - |
| 7. NZ CP006861.1: serotype 1/2a  |  | - | - | - | - | - | - | - | - | - | - | - | - | - | - | - | - | - | - | - | - |
| 8. NZ CP006858.1: serotype 1/2a  |  | - | - | - | - | - | - | - | - | - | - | - | - | - | - | - | - | - | - | - | - |
| 9. NZ CP007017.1: serotype 1/2a  |  | - | - | - | - | - | - | - | - | - | - | - | - | - | - | - | - | - | - | - | - |
| 10. CP007168.1: serotype 1/2b    |  | - | - | - | - | - | - | - | - | - | - | - | T | T | G | - | - | - | G | - | - |
| 11. NZ CP007169.1: serotype 1/2b |  | - | - | - | - | - | - | - | - | - | - | - | T | T | G | - | - | - | G | - | - |
| 12. CP007169.1: serotype 1/2b    |  | - | - | - | - | - | - | - | - | - | - | - | T | T | G | - | - | - | G | - | - |
| 13. NZ CP007168.1: serotype 1/2b |  | - | - | - | - | - | - | - | - | - | - | - | T | T | G | - | - | - | G | - | - |
| 14. CP006874.1: serotype 4b      |  | - | - | - | - | - | - | - | - | - | - | - | T | T | G | - | - | - | G | - | - |
| 15. NZ CP007167.1: serotype 4b   |  | - | - | - | - | - | - | - | - | - | - | - | T | T | G | - | - | - | G | - | - |
| 16. NZ CP007526.1: serotype 4b   |  | - | - | - | - | - | - | - | - | - | - | - | T | T | G | - | - | - | G | - | - |
| 17. NC 019556.1: serotype 4b     |  | - | - | - | - | - | - | - | - | - | - | - | T | T | G | - | - | - | G | - | - |

(a)

| Reverse primer                   |  | G | A | T | G | C | A | G | T | G | A | C | A | C | A | A | A | A | T | G | A | A |
|----------------------------------|--|---|---|---|---|---|---|---|---|---|---|---|---|---|---|---|---|---|---|---|---|---|
| 1. CP044429.1                    |  | - | - | - | - | - | - | - | - | - | - | - | - | - | - | - | - | - | - | - | - | - |
| 2. CP007194.1: serotype 1/2c     |  | - | - | - | - | - | - | - | - | - | - | - | - | - | - | - | - | - | - | - | - | - |
| 3. NZ CP007194.1: serotype 1/2c  |  | - | - | - | - | - | - | - | - | - | - | - | - | - | - | - | - | - | - | - | - | - |
| 4. NZ CP007195.1: serotype 1/2c  |  | - | - | - | - | - | - | - | - | - | - | - | - | - | - | - | - | - | - | - | - | - |
| 5. CP007195.1: serotype 1/2c     |  | - | - | - | - | - | - | - | - | - | - | - | - | - | - | - | - | - | - | - | - | - |
| 6. NZ CP006859.1: serotype 1/2a  |  | - | - | - | - | - | - | - | - | - | - | - | - | - | - | - | - | - | - | - | - | - |
| 7. NZ CP006861.1: serotype 1/2a  |  | - | - | - | - | - | - | - | - | - | - | - | - | - | - | - | - | - | - | - | - | - |
| 8. NZ CP006858.1: serotype 1/2a  |  | - | - | - | - | - | - | - | - | - | - | - | - | - | - | - | - | - | - | - | - | - |
| 9. NZ CP007017.1: serotype 1/2a  |  | - | - | - | - | - | - | - | - | - | - | - | - | - | - | - | - | - | - | - | - | - |
| 10. CP007168.1: serotype 1/2b    |  | - | - | - | C | T | - | - | - | - | - | - | - | - | - | - | - | - | G | - | - | - |
| 11. NZ CP007169.1: serotype 1/2b |  | - | - | - | C | T | - | - | - | - | - | - | - | - | - | - | - | - | G | - | - | - |
| 12. CP007169.1: serotype 1/2b    |  | - | - | - | C | T | - | - | - | - | - | - | - | - | - | - | - | - | G | - | - | - |
| 13. NZ CP007168.1: serotype 1/2b |  | - | - | - | C | T | - | - | - | - | - | - | - | - | - | - | - | - | G | - | - | - |
| 14. CP006874.1: serotype 4b      |  | - | - | - | C | T | - | - | - | - | - | - | - | - | - | - | - | - | G | - | - | - |
| 15. NZ CP007167.1: serotype 4b   |  | - | - | - | C | T | - | - | - | - | - | - | - | - | - | - | - | - | G | - | - | - |
| 16. NZ CP007526.1: serotype 4b   |  | - | - | - | C | T | - | - | - | - | - | - | - | - | - | - | - | - | G | - | - | - |
| 17. NC 019556.1: serotype 4b     |  | - | - | - | C | T | - | - | - | - | - | - | - | - | - | - | - | - | G | - | - | - |

(b)

**Figure S2.** Forward (a) and reverse (b) sequences of the annealing region of the third set of primers designed by Gelbířová *et al.* [19] of 16 reference isolates representing the four major serotypes of *L. monocytogenes* lineages I and II.
